# Supplementary material
Source: publisher site journal article supplement (https://www.dovepress.com/article/325494)
Supplement: Supplementary file 1 [file get_supplementary_file.php]

**Supplementary information**

Figure S1. Multivariable adjusted spline curve for relation between eating pattern scores and risk of OSA

Table S1. Food and supplement items in each group

Table S2. Rotated factor loading based on f Food and dietary supplements

Table S3. Stratified analysis by age on the association between fried food and fruits intake and OSA risk

Table S4. Stratified analysis by gender on the association between fried food and fruits intake and OSA risk

Table S5 stratified analysis by age on the association between eating patterns and OSA risk

Table S6. stratified analysis by gender on the association between eating patterns and OSA risk


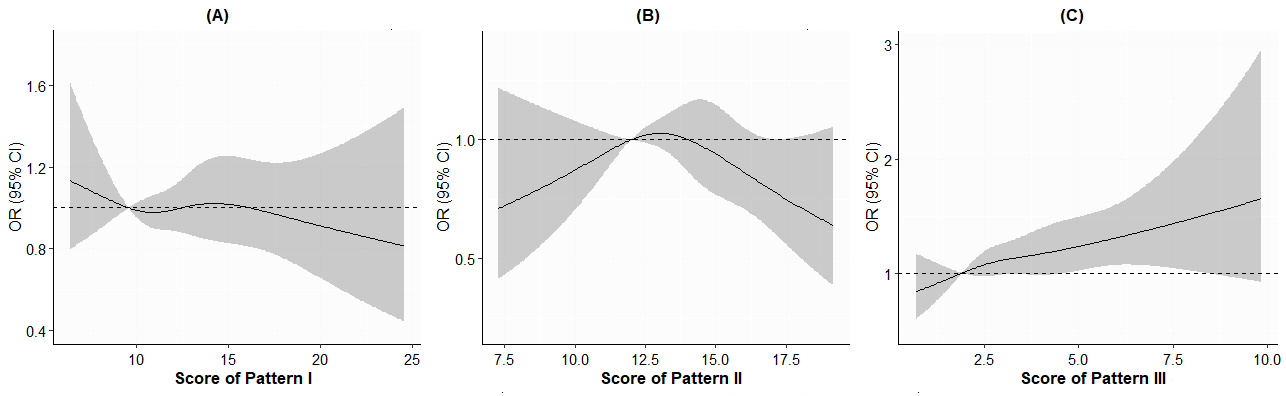


Figure S1. Multivariable adjusted spline curve for relation between eating pattern scores and risk of OSA

Potential nonlinear relationships were examined using restricted cubic splines (knots on the 5th, 50th, and 95th percentiles), with odds ratio (ORs) based on logistic regression models. ORs with 95% confidence intervals (CIs) were plotted for each unit of the exposure against the median of the first tertile. The dash line represents the OR equal to 1. The ORs was adjusted for age, sex, marital status, educational status, retirement, smoking, drinking, leisure-time physical activity, body mass index, neck circumference, waist-hip ratio, hypertension, dyslipidemia, and diabetes. *P* for nonlinear trend was 0.753, 0.100 and 0.824 for pattern Ⅰ, pattern Ⅱ and pattern Ⅲ.

Table S1. description of food groups

|  | Groups | Items |
| --- | --- | --- |
| 1 | Wheat and its products | Noodles, bread, steamed buns, Biscuits, etc. |
| 2 | Rice and its products | Rice noodles, rice flour, rice cakes, etc. |
| 3 | Coarse grain | Corn, millet, purple rice, sorghum, oats, buckwheat, etc. |
| 4 | Beans and soy products | Soybeans, miscellaneous beans, tofu, dried beancurd sticks, soy milk, soy milk, etc |
| 5 | Red meat | Beef, lamb, pork, etc. |
| 6 | Poultry meat | Chicken, duck, goose, pigeon, etc. |
| 7 | Fish and aquatic products | Fish, shrimp, crab, shellfish, squid, etc. |
| 8 | Eggs | Duck, goose, quail, etc |
| 9 | Animal innards | Pig liver/belly/intestines, chicken gizzards, foie gras, etc. |
| 10 | Fried food | Barbecue, fried dough sticks, fried cakes, French fries, etc. |
| 11 | Salted food | Sauce/preserved mustard, fermented bean curd, salted fish/meat, salted products, etc. |
| 12 | Fresh vegetables | Potatoes, Chinese cabbage, cabbage, rape, lettuce, lettuce, pepper, broccoli, cauliflower, loofah, white radish, mustard, eggplant, tomato, carrots, etc. |
| 13 | Nuts | Melon seeds, chestnuts, peanuts, walnuts, cashews, pistachios, etc. |
| 14 | Non-fermented milk | Liquid milk, milk powder, etc. |
| 15 | Fermented milk | Yogurt, cheese, etc. |
| 16 | Fresh fruits | Apple, banana, pear, peach, orange, tangerine, grape, litchi, longan, watermelon, melon, kiwi, etc |
| 17 | Carbonated beverages | Cola, Sprite, Fanta, etc. |
| 18 | Non-carbonated beverages | Fruit and vegetable drinks, tea drinks, lactic acid drinks, including orange, green tea, black tea, yogurt, etc. |
| 19 | Vitamin supplement | Vitamin C, B, K, D and Multivitamin |
| 20 | Mineral supplement | calcium, iron, zinc, etc. |
| 21 | Health care products | Traditional Chinese medicine, health products, etc. |
| 22 | Fish oil | Fish oil, cod liver oil, etc. |

Table S2. Rotated factor loading based on Food and dietary supplements

| Items * | Pattern I | Pattern II | Pattern III | Communality | Uniqueness | Complexity |
| --- | --- | --- | --- | --- | --- | --- |
| Wheat and its products | 0.27 | 0.28 | -0.09 | 0.159 | 0.84 | 2.2 |
| Rice | -0.06 | 0.29 | -0.05 | 0.091 | 0.91 | 1.2 |
| Coarse grain | 0.52 | 0.19 | -0.04 | 0.314 | 0.69 | 1.3 |
| Beans and soy products | 0.46 | 0.24 | 0.19 | 0.298 | 0.70 | 1.9 |
| Red meat | -0.03 | 0.55 | 0.04 | 0.304 | 0.70 | 1.0 |
| Poultry meat | -0.01 | 0.64 | 0.12 | 0.425 | 0.58 | 1.1 |
| Fish and aquatic product | 0.07 | 0.62 | 0.02 | 0.387 | 0.61 | 1.0 |
| Eggs | 0.40 | 0.36 | 0.10 | 0.297 | 0.70 | 2.1 |
| Animal innards | -0.01 | 0.11 | 0.58 | 0.353 | 0.65 | 1.1 |
| Fried food | 0.06 | 0.04 | 0.64 | 0.413 | 0.59 | 1.0 |
| Salted food | 0.05 | -0.08 | 0.57 | 0.339 | 0.66 | 1.1 |
| Vegetables | 0.08 | 0.29 | -0.29 | 0.173 | 0.83 | 2.2 |
| Nuts | 0.43 | 0.20 | 0.16 | 0.249 | 0.75 | 1.8 |
| Non-fermented milk | 0.58 | 0.13 | 0.01 | 0.357 | 0.64 | 1.1 |
| Fermented milk | 0.49 | 0.09 | 0.24 | 0.305 | 0.70 | 1.5 |
| Fruits | 0.30 | 0.29 | -0.14 | 0.193 | 0.81 | 2.4 |
| Carbonate beverages | -0.08 | 0.02 | 0.59 | 0.353 | 0.65 | 1.0 |
| Non-carbonated beverages | 0.07 | -0.05 | 0.49 | 0.247 | 0.75 | 1.1 |
| Vitamin supplement | 0.56 | -0.25 | -0.04 | 0.379 | 0.62 | 1.4 |
| Mineral supplement | 0.51 | -0.25 | -0.10 | 0.329 | 0.67 | 1.5 |
| Health care products | 0.50 | -0.25 | -0.03 | 0.312 | 0.69 | 1.5 |
| Fish oil | 0.51 | -0.21 | -0.06 | 0.312 | 0.69 | 1.4 |
| SS loadings | 2.687 | 1.963 | 1.941 |  |  |  |
| Proportion Explained | 0.408 | 0.298 | 0.295 |  |  |  |
| Cumulative Proportion | 0.408 | 0.705 | 1.000 |  |  |  |

* Eating patterns were extracted by using principal component analysis. Mean item complexity was 1.4. Test of the hypothesis that 3 components were sufficient. The root mean square of the residuals (RMSR) was 0.07, with the empirical chi square of 24578.61 and with probability of less than 0.001.

Table S3.Stratified analysis by age on the association between fried food and fruits intake and OSA risk

|  | N  (Non-OSA / OSA) * | Crude  OR1 (95% CI) † | Adjusted  OR2 (95% CI) ‡ | Adjusted  OR3 (95% CI) § |
| --- | --- | --- | --- | --- |
| Age ≤ 55 years |  |  |  |  |
| Fried food |  |  |  |  |
| <1/month | 2449 / 279 | 1.00 | 1.00 | 1.00 |
| 1-3/month | 1242 / 173 | 1.22 (1.00, 1.49) | 1.25 (0.98, 1.60) | 1.17 (0.91, 1.51) |
| ≥1/week | 342 / 73 | 1.87 (1.41, 2.47) | 1.73 (1.20, 2.48) | 1.57 (1.07, 2.29) |
| P for trend |  | < 0.001 | 0.002 | 0.018 |
| Fruits |  |  |  |  |
| <3/week | 686 / 129 | 1.00 | 1.00 | 1.00 |
| 4-6/week | 596 / 83 | 0.74 (0.55, 0.99) | 0.84 (0.58, 1.21) | 0.84 (0.57, 1.22) |
| ≥1/day | 2751 / 313 | 0.61 (0.49, 0.76) | 0.73 (0.55, 0.97) | 0.73 (0.55, 0.98) |
| P for trend |  | < 0.001 | 0.026 | 0.033 |
| Age > 55 years |  |  |  |  |
| Fried food |  |  |  |  |
| <1/month | 3217 / 490 | 1.00 | 1.00 | 1.00 |
| 1-3/month | 985 / 175 | 1.17 (0.97, 1.40) | 1.12 (0.90, 1.39) | 1.09 (0.87, 1.36) |
| ≥1/week | 240 / 68 | 1.86 (1.39, 2.46) | 1.85 (1.30, 2.63) | 1.70 (1.18, 2.44) |
| P for trend |  | < 0.001 | 0.002 | 0.011 |
| Fruits |  |  |  |  |
| <3/week | 978 / 197 | 1.00 | 1.00 | 1.00 |
| 4-6/week | 708 / 121 | 0.85 (0.66, 1.08) | 0.79 (0.59, 1.05) | 0.77 (0.58, 1.03) |
| ≥1/day | 2756 / 415 | 0.75 (0.62, 0.90) | 0.74 (0.60, 0.92) | 0.71 (0.57, 0.89) |
| P for trend |  | 0.002 | 0.009 | 0.004 |

*N, represents the sample size for non-OSA group or OSA group.

†OR1, without any adjustment.

‡OR2, adjustment for age, sex, marital status, educational status, retirement, smoking, drinking, leisure-time physical activity, neck circumference, waist-hip ratio, hypertension, dyslipidemia, and diabetes.

§OR3, adjustment for body mass index as well as covariates in OR2.

Table S4.Stratified analysis by gender on the association between fried food and fruits intake and OSA risk

|  | N  (Non-OSA / OSA) * | Crude  OR1 (95% CI) † | Adjusted  OR2 (95% CI) ‡ | Adjusted  OR3 (95% CI) § |
| --- | --- | --- | --- | --- |
| Male |  |  |  |  |
| Fried food |  |  |  |  |
| <1/month | 1673 / 383 | 1.00 | 1.00 | 1.00 |
| 1-3/month | 742 / 182 | 1.07 (0.88, 1.30) | 1.14 (0.89, 1.46) | 1.11 (0.87, 1.43) |
| ≥1/week | 208 / 85 | 1.79 (1.35, 2.34) | 2.00 (1.37, 2.92) | 1.89 (1.29, 2.78) |
| *P* for trend |  | < 0.001 | 0.001 | 0.004 |
| Fruits |  |  |  |  |
| <3/week | 627 / 200 | 1.00 | 1.00 | 1.00 |
| 4-6/week | 441 / 113 | 0.80 (0.62, 1.04) | 0.72 (0.52, 1.00) | 0.70 (0.50, 0.98) |
| ≥1/day | 1555 / 337 | 0.68 (0.56, 0.83) | 0.62 (0.48, 0.80) | 0.58 (0.45, 0.75) |
| *P* for trend |  | < 0.001 | < 0.001 | < 0.001 |
| Female |  |  |  |  |
| Fried food |  |  |  |  |
| <1/month | 3993 / 386 | 1.00 | 1.00 | 1.00 |
| 1-3/month | 1485 / 166 | 1.16 (0.95, 1.40) | 1.18 (0.95, 1.47) | 1.11 (0.89, 1.39) |
| ≥1/week | 374 / 56 | 1.55 (1.14, 2.07) | 1.63 (1.14, 2.29) | 1.45 (1.02, 2.07) |
| *P* for trend |  | 0.004 | 0.005 | 0.049 |
| Fruits |  |  |  |  |
| <3/week | 1037 / 126 | 1.00 | 1.00 | 1.00 |
| 4-6/week | 863 / 91 | 0.87 (0.65, 1.15) | 0.88 (0.64, 1.21) | 0.89 (0.64, 1.23) |
| ≥1/day | 3952 / 391 | 0.81 (0.66, 1.01) | 0.86 (0.68, 1.09) | 0.87 (0.68, 1.12) |
| *P* for trend |  | 0.062 | 0.229 | 0.288 |

*N, represents the sample size for non-OSA group or OSA group.

†OR1, without any adjustment.

‡OR2, adjustment for age, sex, marital status, educational status, retirement, smoking, drinking, leisure-time physical activity, neck circumference, waist-hip ratio, hypertension, dyslipidemia, and diabetes.

§OR3, adjustment for body mass index as well as covariates in OR2.

Table S5. stratified analysis by age on the association between eating patterns and risk of OSA

|  | N  (Non-OSA/OSA) * | Crude  OR1 (95% CI) † | Adjusted  OR2 (95% CI) ‡ | Adjusted  OR3 (95% CI) § | Adjusted  OR4 (95% CI) ll |
| --- | --- | --- | --- | --- | --- |
| Age <=55 years |  |  |  |  |  |
| Pattern I |  |  |  |  |  |
| Tertile 1 | 1288 / 236 | 1.00 | 1.00 | 1.00 | 1.00 |
| Tertile 2 | 1466 / 170 | 0.63 (0.51, 0.78) | 0.84 (0.65, 1.10) | 0.86 (0.65, 1.13) | 0.79 (0.59, 1.06) |
| Tertile 3 | 1279 / 119 | 0.51 (0.40, 0.64) | 0.88 (0.65, 1.20) | 0.95 (0.69, 1.31) | 0.84 (0.59, 1.20) |
| P for trend |  | < 0.001 | 0.486 | 0.839 | 0.429 |
| Every-1 score increment |  | 0.90 (0.86, 0.93) | 0.98 (0.93, 1.02) | 0.99 (0.94, 1.04) | 0.96 (0.88, 1.06) |
| Pattern II |  |  |  |  |  |
| Tertile 1 | 1263 / 163 | 1.00 | 1.00 | 1.00 | 1.00 |
| Tertile 2 | 1356 / 190 | 1.09 (0.87, 1.36) | 1.12 (0.86, 1.48) | 1.10 (0.83, 1.45) | 1.08 (0.81, 1.44) |
| Tertile 3 | 1414 / 172 | 0.94 (0.75, 1.18) | 1.04 (0.79, 1.38) | 1.06 (0.80, 1.41) | 1.07 (0.79, 1.46) |
| P for trend |  | 0.455 | 0.899 | 0.772 | 0.876 |
| Every-1 score increment |  | 0.97 (0.92, 1.02) | 1.00 (0.94, 1.06) | 1.00 (0.94, 1.07) | 0.97 (0.86, 1.10) |
| Pattern III |  |  |  |  |  |
| Tertile 1 | 1095 / 120 | 1.00 | 1.00 | 1.00 | 1.00 |
| Tertile 2 | 1339 / 152 | 1.04 (0.81, 1.33) | 1.24 (0.91, 1.68) | 1.19 (0.87, 1.63) | 1.20 (0.88, 1.65) |
| Tertile 3 | 1599 / 253 | 1.44 (1.15, 1.82) | 1.54 (1.16, 2.05) | 1.39 (1.04, 1.87) | 1.45 (1.07, 1.97) |
| P for trend |  | < 0.001 | 0.003 | 0.030 | 0.023 |
| Every-1 score increment |  | 1.11 (1.05, 1.17) | 1.10 (1.02, 1.17) | 1.07 (0.99, 1.15) | 1.00 (0.87, 1.14) |
| Age >55 years |  |  |  |  |  |
| Pattern I |  |  |  |  |  |
| Tertile 1 | 1288 / 236 | 1.00 | 1.00 | 1.00 | 1.00 |
| Tertile 2 | 1466 / 170 | 0.63 (0.51, 0.78) | 0.84 (0.65, 1.10) | 0.86 (0.65, 1.13) | 1.13 (0.88, 1.44) |
| Tertile 3 | 1279 / 119 | 0.51 (0.40, 0.64) | 0.88 (0.65, 1.20) | 0.95 (0.69, 1.31) | 1.09 (0.83, 1.42) |
| P for trend |  | < 0.001 | 0.486 | 0.839 | 0.706 |
| Every-1 score increment |  | 0.90 (0.86, 0.93) | 0.98 (0.93, 1.02) | 0.99 (0.94, 1.04) | 0.98 (0.92, 1.04) |
| Pattern II |  |  |  |  |  |
| Tertile 1 | 1263 / 163 | 1.00 | 1.00 | 1.00 | 1.00 |
| Tertile 2 | 1356 / 190 | 1.09 (0.87, 1.36) | 1.12 (0.86, 1.48) | 1.10 (0.83, 1.45) | 1.02 (0.81, 1.28) |
| Tertile 3 | 1414 / 172 | 0.94 (0.75, 1.18) | 1.04 (0.79, 1.38) | 1.06 (0.80, 1.41) | 0.84 (0.65, 1.08) |
| P for trend | 0.5901 | 0.455 | 0.899 | 0.772 | 0.168 |
| Every-1 score increment |  | 0.97 (0.92, 1.02) | 1.00 (0.94, 1.06) | 1.00 (0.94, 1.07) | 0.98 (0.89, 1.08) |
| Pattern III |  |  |  |  |  |
| Tertile 1 | 1095 / 120 | 1.00 | 1.00 | 1.00 | 1.00 |
| Tertile 2 | 1339 / 152 | 1.04 (0.81, 1.33) | 1.24 (0.91, 1.68) | 1.19 (0.87, 1.63) | 1.04 (0.83, 1.29) |
| Tertile 3 | 1599 / 253 | 1.44 (1.15, 1.82) | 1.54 (1.16, 2.05) | 1.39 (1.04, 1.87) | 1.15 (1.01, 1.45) |
| P for trend | 6.00E-04 | < 0.001 | 0.003 | 0.030 | 0.044 |
| Every-1 score increment |  | 1.11 (1.05, 1.17) | 1.10 (1.02, 1.17) | 1.07 (0.99, 1.15) | 1.19 (1.04, 1.37) |

*N represents the sample size for non-OSA group or OSA group.

**†**OR1, without any adjustment.

**‡**OR2, adjustment for age, sex, marital status, educational status, retirement, smoking, drinking, leisure-time physical activity, neck circumference, waist-hip ratio, hypertension, dyslipidemia, and diabetes.

**§**OR3, adjustment for body mass index as well as covariates in OR2.

**ll**OR4, adjustment for three patterns as well as covariates in OR2.

Table S6. stratified analysis by gender on the association between eating patterns and risk of OSA

|  | N  (Non-OSA/OSA) * | Crude  OR1 (95% CI) † | Adjusted  OR2 (95% CI) ‡ | Adjusted  OR3 (95% CI) § | Adjusted  OR4 (95% CI) ll |
| --- | --- | --- | --- | --- | --- |
| Male |  |  |  |  |  |
| Pattern I |  |  |  |  |  |
| Tertile 1 | 1069 / 295 | 1.00 | 1.00 | 1.00 | 1.00 |
| Tertile 2 | 873 / 206 | 0.86 (0.70, 1.04) | 1.11 (0.86, 1.44) | 1.09 (0.84, 1.42) | 1.11 (0.84, 1.47) |
| Tertile 3 | 681 / 149 | 0.79 (0.64, 0.99) | 0.97 (0.72, 1.31) | 0.97 (0.72, 1.32) | 0.98 (0.71, 1.37) |
| P for trend |  | 0.041 | 0.801 | 0.822 | 0.845 |
| Every-1 score increment |  | 0.96 (0.93, 0.99) | 0.99 (0.94, 1.03) | 0.99 (0.95, 1.03) | 0.97 (0.89, 1.05) |
| Pattern II |  |  |  |  |  |
| Tertile 1 | 849 / 221 | 1.00 | 1.00 | 1.00 | 1.00 |
| Tertile 2 | 895 / 229 | 0.98 (0.80, 1.21) | 1.00 (0.77, 1.30) | 0.99 (0.76, 1.28) | 0.94 (0.72, 1.23) |
| Tertile 3 | 879 / 200 | 0.87 (0.71, 1.08) | 0.85 (0.65, 1.12) | 0.84 (0.64, 1.10) | 0.78 (0.58, 1.05) |
| P for trend |  | 0.190 | 0.208 | 0.175 | 0.126 |
| Every-1 score increment |  | 0.96 (0.92, 1.01) | 0.98 (0.92, 1.03) | 0.97 (0.92, 1.03) | 1.02 (0.91, 1.14) |
| Pattern III |  |  |  |  |  |
| Tertile 1 | 742 / 173 | 1.00 | 1.00 | 1.00 | 1.00 |
| Tertile 2 | 894 / 199 | 0.95 (0.76, 1.20) | 1.23 (0.93, 1.62) | 1.22 (0.92, 1.62) | 1.24 (0.93, 1.64) |
| Tertile 3 | 987 / 278 | 1.21 (0.98, 1.50) | 1.41 (1.07, 1.85) | 1.38 (1.05, 1.81) | 1.42 (1.07, 1.88) |
| P for trend |  | 0.030 | 0.018 | 0.030 | 0.017 |
| Every-1 score increment |  | 1.05 (1.00, 1.11) | 1.10 (1.02, 1.18) | 1.09 (1.01, 1.17) | 1.08 (0.94, 1.23) |
| Female |  |  |  |  |  |
| Pattern I |  |  |  |  |  |
| Tertile 1 | 1679 / 202 | 1.00 | 1.00 | 1.00 | 1.00 |
| Tertile 2 | 1979 / 191 | 0.80 (0.65, 0.99) | 0.91 (0.72, 1.15) | 0.93 (0.73, 1.19) | 0.91 (0.70, 1.17) |
| Tertile 3 | 2194 / 215 | 0.81 (0.67, 1.00) | 0.95 (0.74, 1.22) | 1.00 (0.77, 1.30) | 0.98 (0.74, 1.29) |
| P for trend |  | 0.100 | 0.776 | 0.874 | 0.968 |
| Every-1 score increment |  | 0.97 (0.94, 1.00) | 0.99 (0.96, 1.03) | 1.00 (0.96, 1.03) | 0.97 (0.91, 1.04) |
| Pattern II |  |  |  |  |  |
| Tertile 1 | 1985 / 201 | 1.00 | 1.00 | 1.00 | 1.00 |
| Tertile 2 | 1915 / 215 | 1.11 (0.91, 1.36) | 1.15 (0.92, 1.44) | 1.15 (0.91, 1.45) | 1.15 (0.91, 1.46) |
| Tertile 3 | 1952 / 192 | 0.97 (0.79, 1.20) | 1.03 (0.82, 1.30) | 1.06 (0.83, 1.35) | 1.05 (0.81, 1.36) |
| P for trend |  | 0.613 | 0.962 | 0.799 | 0.945 |
| Every-1 score increment |  | 0.97 (0.93, 1.02) | 0.99 (0.94, 1.04) | 1.00 (0.95, 1.05) | 0.96 (0.87, 1.06) |
| Pattern III |  |  |  |  |  |
| Tertile 1 | 2125 / 223 | 1.00 | 1.00 | 1.00 | 1.00 |
| Tertile 2 | 1968 / 185 | 0.90 (0.73, 1.10) | 1.02 (0.81, 1.28) | 0.98 (0.78, 1.24) | 0.97 (0.77, 1.24) |
| Tertile 3 | 1759 / 200 | 1.08 (0.89, 1.32) | 1.23 (0.98, 1.55) | 1.10 (0.87, 1.40) | 1.10 (0.86, 1.41) |
| P for trend |  | 0.312 | 0.065 | 0.383 | 0.405 |
| Every-1 score increment |  | 1.04 (0.98, 1.10) | 1.08 (1.01, 1.15) | 1.05 (0.98, 1.13) | 1.12 (1.02, 1.29) |

*N represents the sample size for non-OSA group or OSA group.

**†**OR1, without any adjustment.

**‡**OR2, adjustment for age, sex, marital status, educational status, retirement, smoking, drinking, leisure-time physical activity, neck circumference, waist-hip ratio, hypertension, dyslipidemia, and diabetes.

**§**OR3, adjustment for body mass index as well as covariates in OR2.

**ll**OR4, adjustment for three patterns as well as covariates in OR2.
